# Supplementary material for: PESI - a taxonomic backbone for Europe
Source: PubMed Central journal article supplement (PMC4609752; doi:10.3897/bdj.3.e5848), 2015-09-28
Supplement: biodiversity_data_journal-3-e5848-s026.pdf [file biodiversity_data_journal-3-e5848-s026.pdf]

# GLOBAL BIODIVERSITY INFORMATION FACILITY

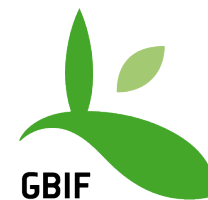

## *PESI Publishers Meeting*

*Applying taxonomy to organise and  
deliver publications to biologists*

David Remsen, Senior Programme Officer, GBIF  
15 July Amsterdam

[WWW.GBIF.ORG](http://WWW.GBIF.ORG)

# Scope of this presentation

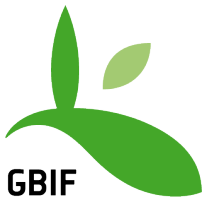

- Promote dissemination and accessibility of scholarly publications
- Increase impact through integrated activity

# RSS: Really Simple Syndication

<http://www.bioone.org/toc/cope/current>

<http://www.bioone.org/action/showFeed?type=etoc&feed=rss&jc=cope>

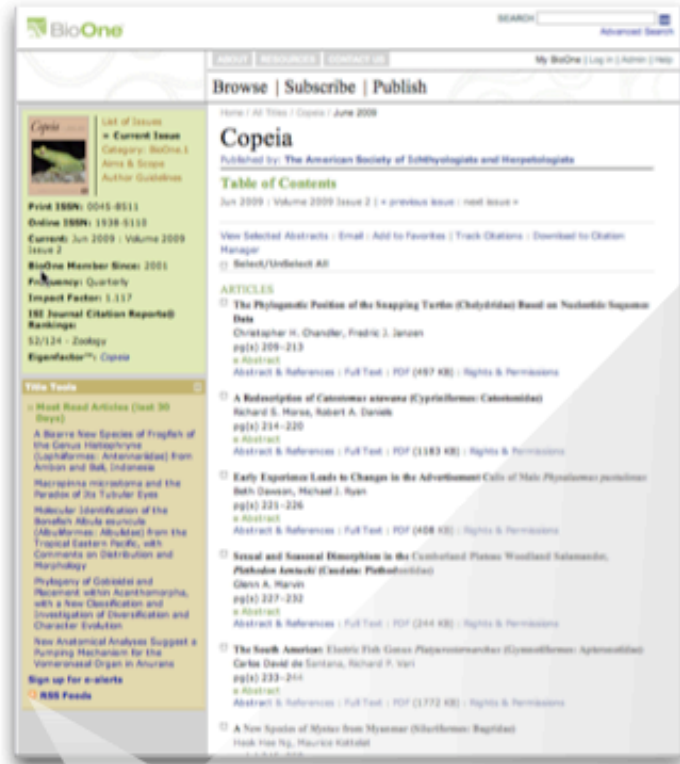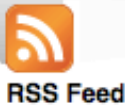

<Channel>

Metadata about the feed  
 Journal Title  
 Description  
 Links      Image (Current Issue)

| Item (Article)         | Article Title | Link |
|------------------------|---------------|------|
| Description (Abstract) |               | GUID |

Item (Article)

Item (Article)

Item (Article)

Item (Article)

Item (Article)

</Channel>

Discovery of articles by publication



# Index of 1000+ RSS feeds

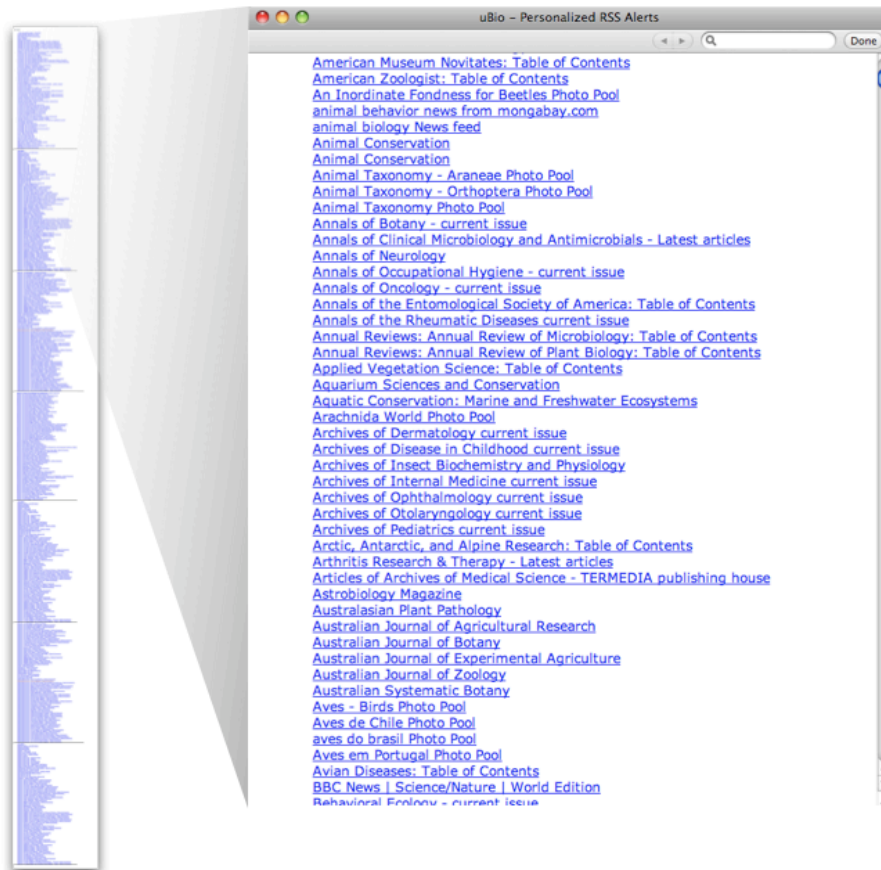

- uBio Work catalogued RSS feeds
- Scholarly Publications
- Few Scholarly Blogs



# Scientific Names embedded in RSS Text

- Revised diagnosis and redescription of *Apistobuthus susanae* (Scorpiones, Buthidae)  
Shahrokh Navidpour, Graeme Lowe  
pg(s) 45–59  
[Abstract](#)  
[Abstract & References](#) : [Full Text](#) : [PDF \(3791 KB\)](#) : [Rights & Permissions](#)
- On the endemic Sri Lankan genus *Pettalus* (Opiliones, Cyphophthalmi, Pettalidae) with a description of a new species and a discussion of its diversity  
Prashant Sharma, Indika Karunarathna, Gonzalo Giribet  
pg(s) 60–67  
[Abstract](#)  
[Abstract & References](#) : [Full Text](#) : [PDF \(2957 KB\)](#) : [Rights & Permissions](#)
- Characterization of the green iridescence on the chelicerae of the tube web spider, *Segestria florentina* (Rossi 1790) (Araneae, Segestriidae)  
A. L. Ingram, A. D. Ball, A. R. Parker, O. DeParis, J. Boulenguez, S. Berthier  
pg(s) 68–71  
[Abstract](#)  
[Abstract & References](#) : [Full Text](#) : [PDF \(542 KB\)](#) : [Rights & Permissions](#)
- Post-reproductive changes in female crab spiders (*Misumena vatia*) exposed to a rich prey source

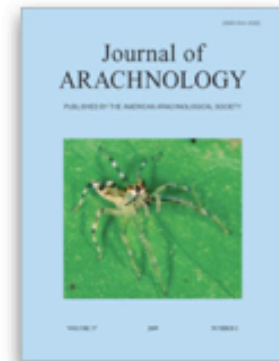

# Scientific Names are links to taxa

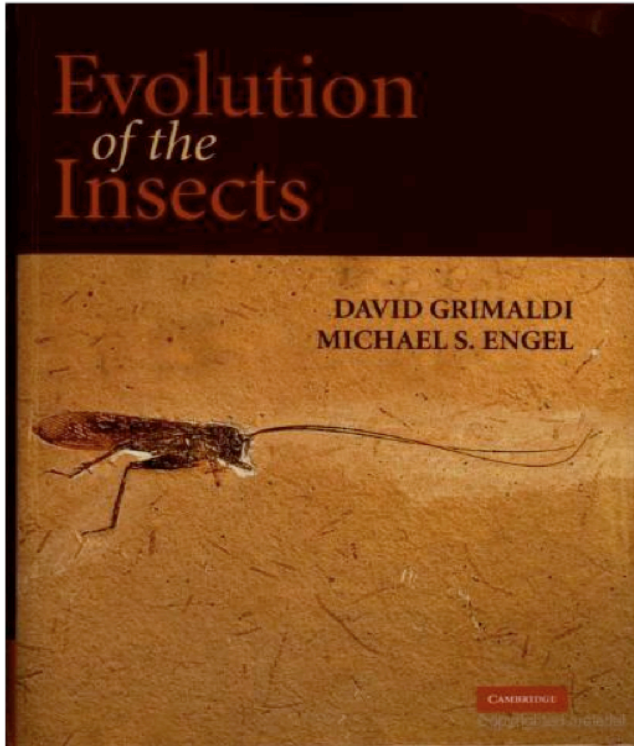

All *accumulated information* of a species is tied to a scientific name, a name that serves as a link between what has been learned in the past and what we today add to the body of knowledge.

- Grimaldi & Engel, 2005, Evolution of the Insects

Nomenclature is what makes literature taxonomic literature

# TaxonFinder: Finds scientific names in RSS Text

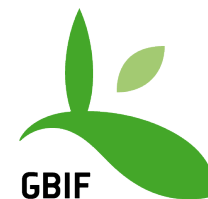

BioOne logo and navigation links: Browse | Subscribe | Publish

Journal: **Copeia**  
 Published by: The American Society of Ichthyologists and Herpetologists

Table of Contents  
 Jun 2009 | Volume 2009 Issue 2 | < previous issue | next issue >

View Selected Abstracts - Email - Add to Favorites | Track Citations - Download to Citation Manager

ARTICLES

- 1 The Phylogenetic Position of the Snapping Turtle (*Chelydra*) Based on Nuclear DNA Sequences  
 Christopher H. Chandler, Fredric J. Janzen  
 pp(1) 209-213  
 Abstract & References - Full Text - PDF (497 KB) - Rights & Permissions
- 2 A Redescription of *Catantops stramineus* (Cynipidae: Catantopidae)  
 Richard B. Harris, Robert A. Daniels  
 pp(1) 214-220  
 Abstract & References - Full Text - PDF (1383 KB) - Rights & Permissions
- 3 Early Experience Leads to Changes in the Advertisement Calls of Male *Myadestes occidentalis*  
 Nath Dawkins, Michael J. Ryan  
 pp(1) 221-226  
 Abstract & References - Full Text - PDF (408 KB) - Rights & Permissions
- 4 Sexual and Seasonal Disruption in the Coastland Plains Woodland Salamander, *Plethodon lewisi* (Ecaetidae: Plethodontidae)  
 Glenn A. Harvin  
 pp(1) 227-232  
 Abstract & References - Full Text - PDF (244 KB) - Rights & Permissions
- 5 The South American Electric Fish Genus *Platyprocterus* (Gymnotiformes: Apteronotidae)  
 Carlos David de Santana, Richard P. Vari  
 pp(1) 233-244  
 Abstract & References - Full Text - PDF (1772 KB) - Rights & Permissions
- 6 A New Species of *Myadestes* from Myanmar (Columbidae: Rapiniidae)  
 Hoek Van Ng, Maurice Kottelat  
 pp(1) 245-250

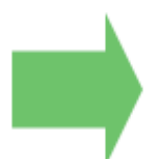

uBio logo and navigation: Universal Biological Indexer and Organizer | MBLWHOI Library

Find name... 11,106,374 NameBank Records

Tools - FindIT (help)

Reading <http://api.ingentaconnect.com/content/bac/zo/latest?format=rss>

Strings: 18  
 Time: 0.76 sec

| Name String (as appears in text) | Canonical form of string   |
|----------------------------------|----------------------------|
| Arachnida                        | Arachnida                  |
| Arvicolinae                      | Arvicolinae                |
| Aspersina murmanica              | Aspersina murmanica        |
| Beauchampiella eudactylota       | Beauchampiella eudactylota |
| Eocanthecona furcellata          | Eocanthecona furcellata    |
| Euchlanidae                      | Euchlanidae                |
| Heteroptera                      | Heteroptera                |
| Mammalia                         | Mammalia                   |
| Microtus                         | Microtus                   |
| Opillones                        | Opillones                  |
| Pentatomidae                     | Pentatomidae               |
| Phalangida                       | Phalangida                 |
| Proterosuchus fergusii           | Proterosuchus fergusii     |
| Reptilia                         | Reptilia                   |
| Rodentia                         | Rodentia                   |
| Rotifera                         | Rotifera                   |
| Timea                            | Timea                      |
| Trichosurus vulpecula            | Trichosurus vulpecula      |

Mission statement | Advisory board | People | Contact us  
 uBio copyright © 2009 by The Marine Biological Laboratory



# uBioRSS : Process Feeds

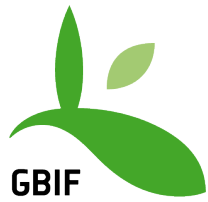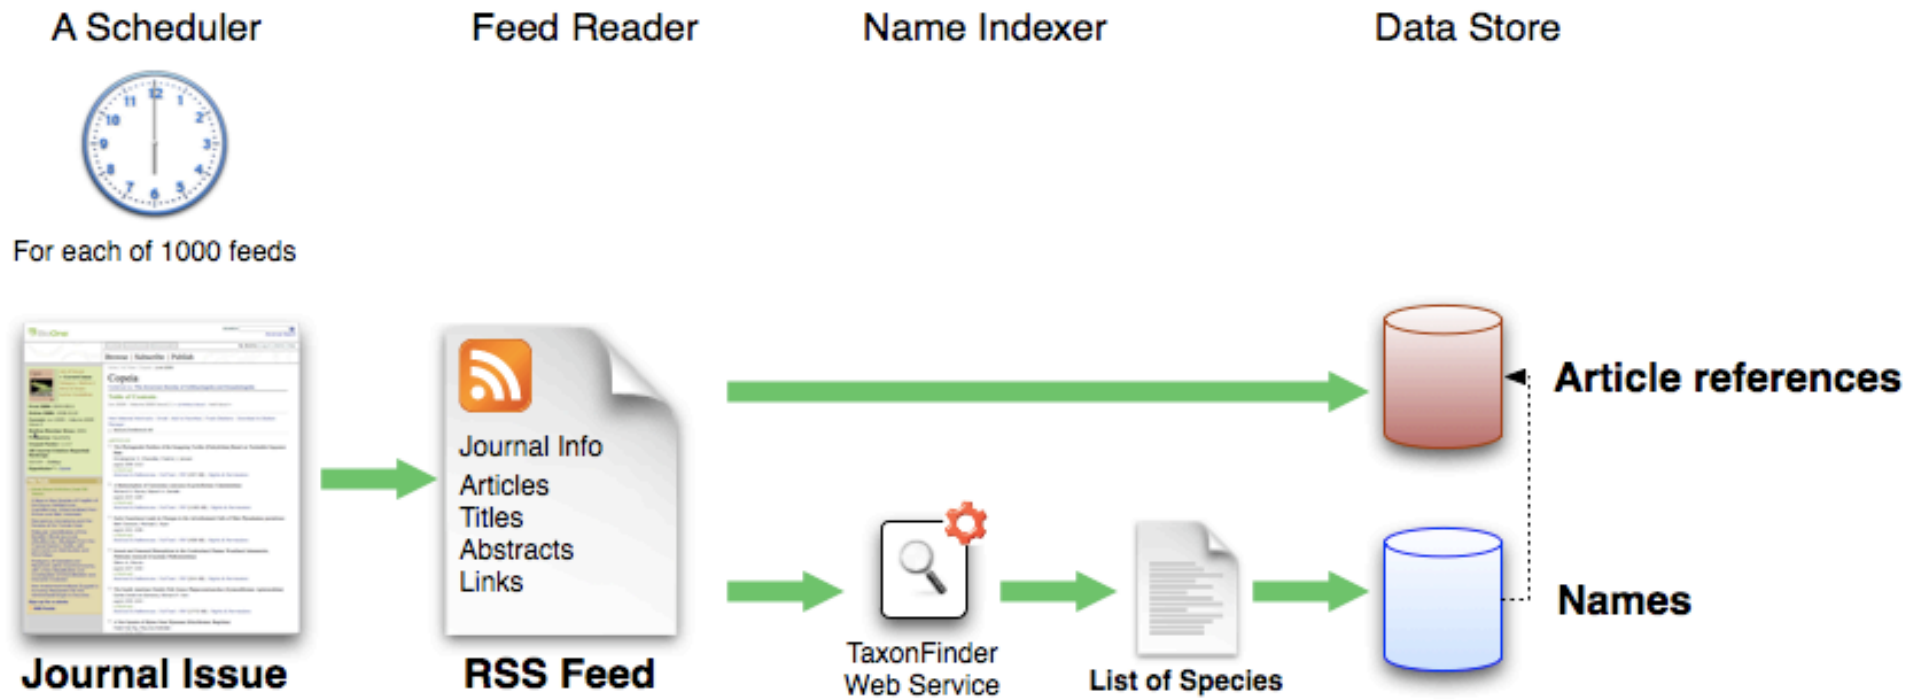

# uBioRSS : Access Taxonomic Checklists

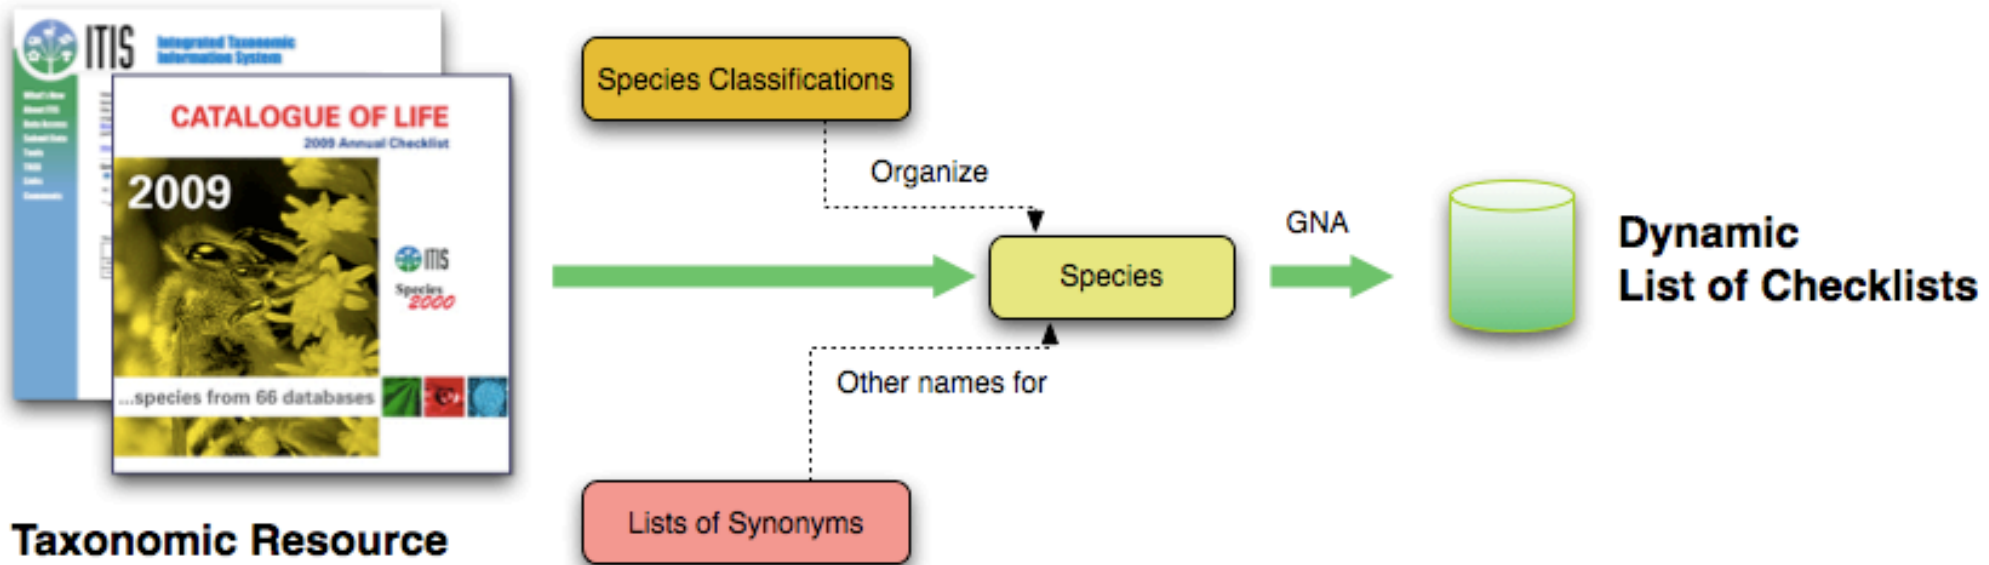

Taxonomic Resources provide the dictionaries that make TaxonFinder work

# uBioRSS : Access Taxonomic Checklists

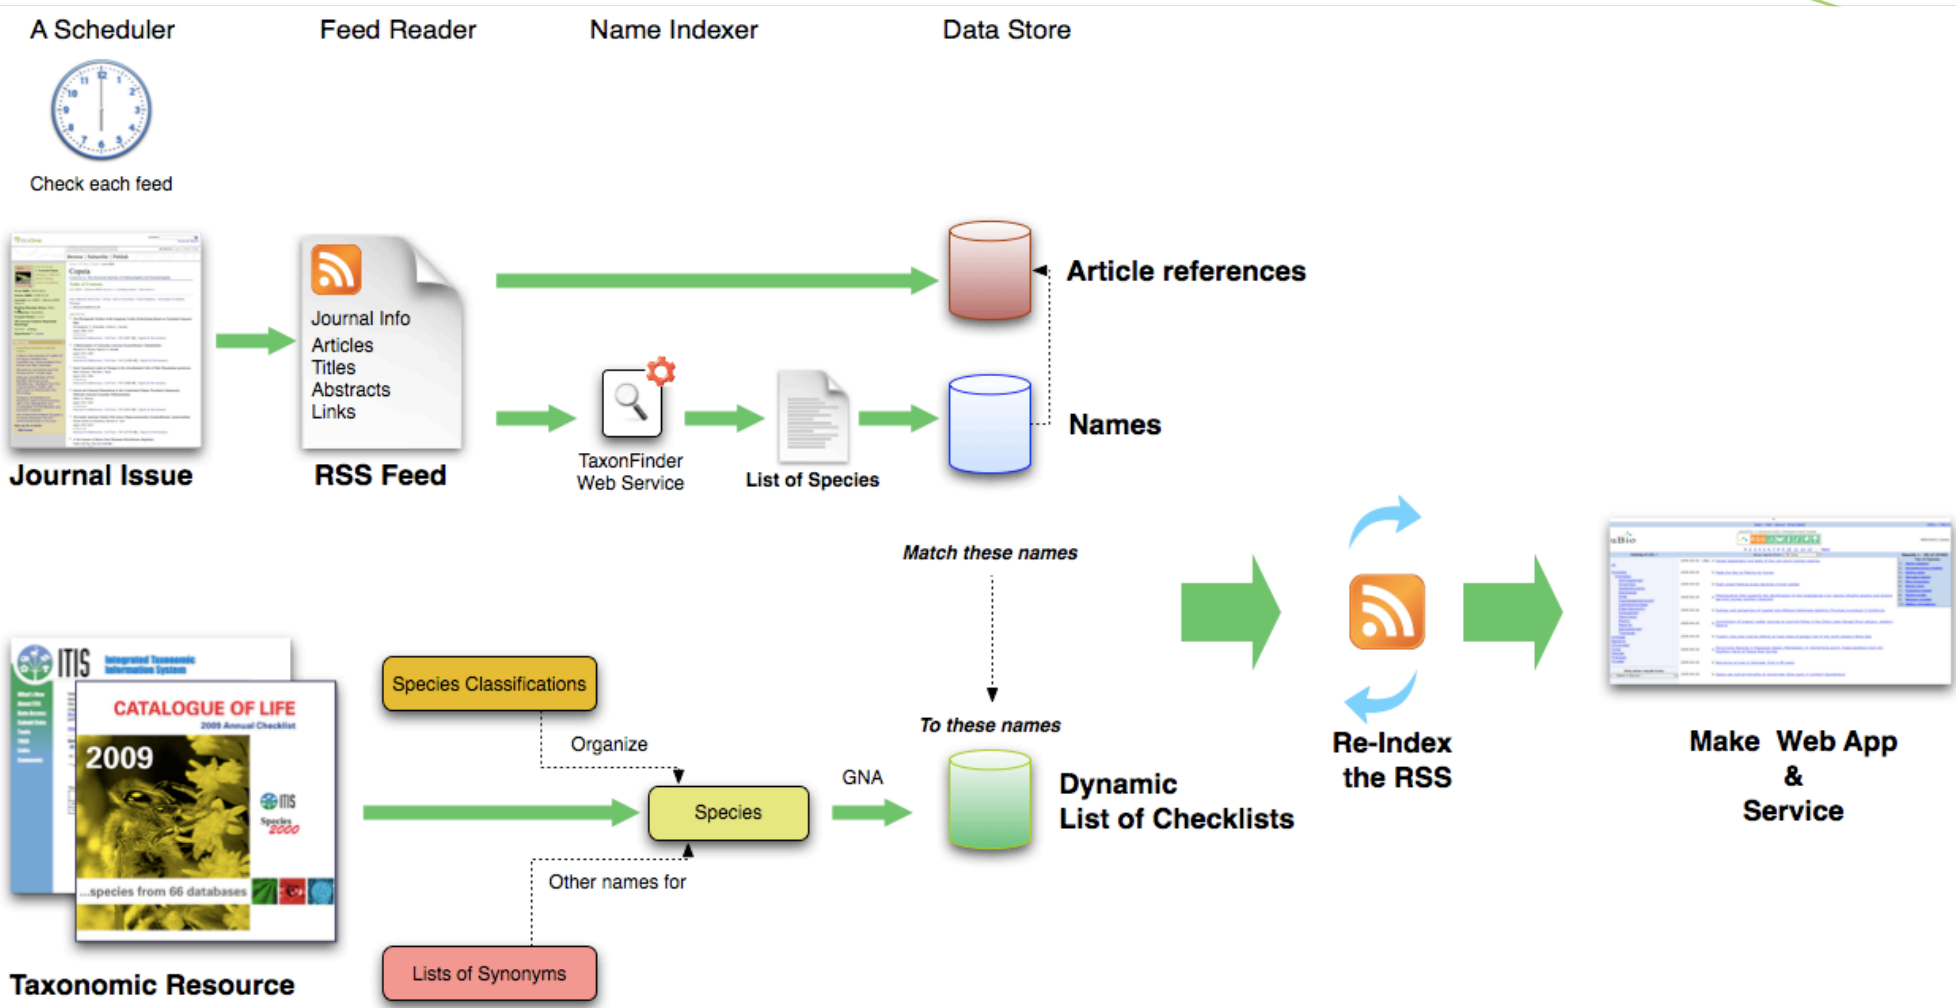

# uBioRSS : Publications re-organised by taxonomy

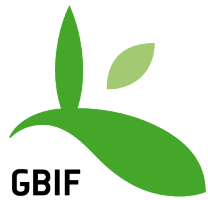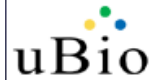

[\[login\]](#) | [\[help\]](#) | [\[signup\]](#) | [\[show feeds\]](#)

[\[RSS 1\]](#) | [\[RSS 2\]](#)

uBioRSS: a taxonomically intelligent feed reader

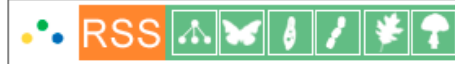

MBLWHOI Library

[1](#) [2](#) [3](#) [4](#) [5](#) [6](#) [7](#) [8](#) [9](#) [10](#) [11](#) [12](#) [13](#) ... | [Next](#)

Catalog of Life ▶

Show results from:

Results 1 - 50 of 121937

Top 10 Species

- 1) [Escherichia coli](#)
- 2) [Arabidopsis thaliana](#)
- 3) [Drosophila melanogaster](#)
- 4) [Saccharomyces cerevisiae](#)
- 5) [Homo sapiens](#)
- 6) [Caenorhabditis elegans](#)
- 7) [Zea mays](#)
- 8) [Pseudomonas aeruginosa](#)
- 9) [Glycine max](#)
- 10) [Oryza sativa](#)

[All](#)

- [Animalia](#)
- [Archaea](#)
- [Bacteria](#)
- [Chromista](#)
- [Fungi](#)
- [Plantae](#)
- [Protozoa](#)
- [Viruses](#)

This classification is based on the Species 2000 and ITIS Catalogue of Life 2007 Annual Checklist

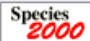

Only show results from:

-- Select a Source --

- |            |                                                                                                                     |
|------------|---------------------------------------------------------------------------------------------------------------------|
| 2009-06-23 | ⊕ <a href="#">Antiporter Antics</a>                                                                                 |
| 2009-06-23 | ⊕ <a href="#">Dinosaurs actually slimmer than we thought, say boffins</a>                                           |
| 2009-06-23 | ⊕ <a href="#">The Three Faces of Life [Science Tattoo]</a>                                                          |
| 2009-06-23 | ⊕ <a href="#">Viruses That Make You Fly, Bacteria That Keep You On the Ground</a>                                   |
| 2009-06-23 | ⊕ <a href="#">Thank You</a>                                                                                         |
| 2009-06-23 | ⊕ <a href="#">Review of the genera Calodema and Metaxymorpha (Coleoptera: Buprestidae: Stigmoderini)</a>            |
| 2009-06-23 | ⊕ <a href="#">John Andrew Chemsak</a>                                                                               |
| 2009-06-23 | ⊕ <a href="#">2008, Proceedings of the Pacific Coast Entomological Society</a>                                      |
| 2009-06-23 | ⊕ <a href="#">Embolemus nearcticus (Brues) (Hymenoptera: Embolemidae) in Idaho: a new state record</a>              |
| 2009-06-23 | ⊕ <a href="#">New record of the marine littoral ant, Odontomachus malignus Smith, F. 1859, in Palau</a>             |
| 2009-06-23 | ⊕ <a href="#">New host record for Caenocholax fenyesi sensu lato (Strepsiptera: Myrmecolacidae) from Costa Rica</a> |

# uBioRSS : RSS details available with matched names

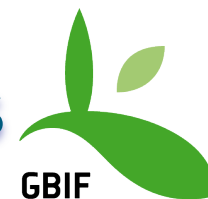

GBIF

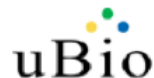

[login](#) | [help](#) | [signup](#) | [show feeds](#)

[RSS 1](#) | [RSS 2](#)

uBioRSS: a taxonomically intelligent feed reader

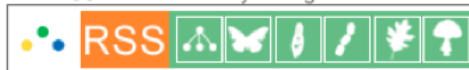

MBLWHOI Library

1 2 3 4 5 6 7 8 9 10 11 12 13 ... | [Next](#)

Catalog of Life ▶

Show results from:

[All](#)

[Animalia](#)

[Chordata](#)

[Aves](#)

[Anseriformes](#)

[Apodiformes](#)

[Bucerotiformes](#)

[Ciconiiformes](#)

[Coliiformes](#)

[Columbiformes](#)

[Coraciiformes](#)

[Craciformes](#)

[Cuculiformes](#)

[Galbuliformes](#)

[Galliformes](#)

[Gruiformes](#)

[Musophagiformes](#)

[Passeriformes](#)

[Piciformes](#)

[Psittaciformes](#)

[Strigiformes](#)

[Struthioniformes](#)

[Tinamiformes](#)

[Trogoniformes](#)

[Turniciformes](#)

[Upupiformes](#)

[Archaea](#)

[Bacteria](#)

[Chromista](#)

2009-06-20

⊕ [Occurrence Records in Papuanian Aglaia \(Meliaceae\): A. Pannelliana and A. Puberulanthera from the Southern Karst of Papua New Guinea](#)

2009-06-19

⊖ [Expectant parents groom adult sons according to previous alloparenting in a biparental cooperatively breeding primate](#)

## ScienceDirect Publication: Animal Behaviour

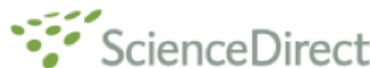

Publication year: 2009

**Source:** Animal Behaviour, In Press, Corrected Proof, Available online 18 June 2009  
Anita J., Ginther, Charles T., Snowden

In the biparental, cooperatively breeding cottontop tamarin, *Saguinus oedipus oedipus*, adult sons provide an energetically and reproductively valuable service to their breeding parents by helping to carry infants. Other species may use aggressive coercion or punishment to enforce alloparenting. Yet, affiliation in primates is important in negotiating social relationships and may be exchanged for services. We hypothesized that the rewards of grooming might be used by expectant parents to cultivate strong relationships with and maintain the services of adult son alloparents. We tested for an interchange trade of aggression or grooming for infant carrying according to a biological market. Individual...

**Keywords:** *Acipenser transmontanus*, *Callimico goeldii*, *Callithrix jacchus*, *Callithrix jacchus jacchus*, *Callithrix kuhli*, *Euplectes orix*, *Haliotis asinina*, *Heterocephalus glaber*, *Leontopithecus rosalia*, *Macaca fascicularis*, *Macaca mulatta*, *Macaca sylvanus*, *Malurus cyaneus*, *Microcebus murinus*, *Morone chrysops*, *Morone saxatilis*, *Mungos mungo*, *Neolamprologus pulcher*, *Saguinus fuscicollis*, *Saguinus labiatus*, *Saguinus mystax*, *Saguinus oedipus*, *Saguinus oedipus oedipus*, *Suricata suricatta*

2009-06-19

⊕ [Use of landscape metrics to predict avian nest survival in a fragmented midwestern forest landscape](#)

2009-06-17

⊕ [Migratory songbird use of shade coffee in the Venezuelan Andes with implications for conservation of cerulean warbler](#)

Results 1 - 50 of 5079

Top 10 Species

- 1) [Parus major](#)
- 2) [Gallus gallus](#)
- 3) [Sturnus vulgaris](#)
- 4) [Columba livia](#)
- 5) [Taeniopygia guttata](#)
- 6) [Anas platyrhynchos](#)
- 7) [Passer domesticus](#)
- 8) [Ficedula hypoleuca](#)
- 8) [Hirundo rustica](#)
- 10) [Uria aalge](#)



# Publications: Taxonomically organised

1000s of RSS feeds

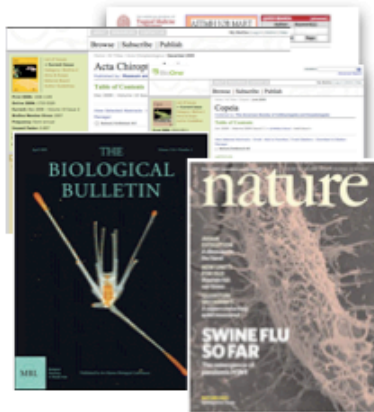

100,000s of articles

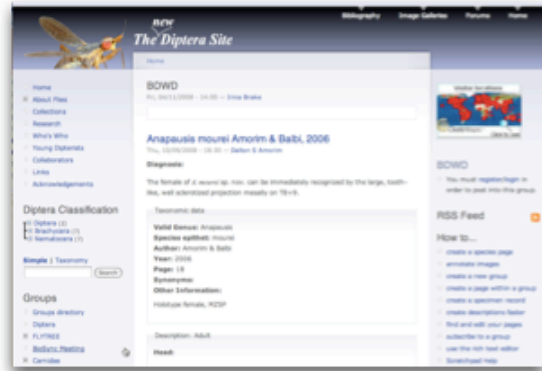

125,000 species of Diptera

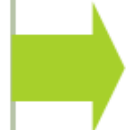

Re-Organized by Taxonomic Group

-  Diptera (Flies) (125,000)
-  Culicidae (Mosquitoes) 3000+
-  Aedes (Yellow fever mosquitoes) 961
-  Aedes aegypti  
Stegomyia aegypti  
Culex aegypti

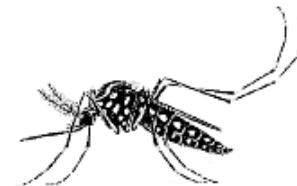

# Publications: Thematically organised

1000s of RSS feeds

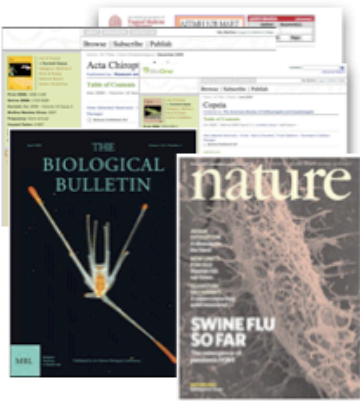

100,000s of articles

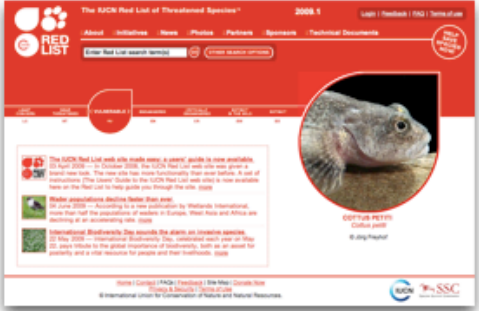

8241 species

Organised by Thematic Species groups

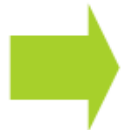

-  Endangered Vertebrates 2366 articles
-  Endangered/Threatened Birds 961 articles
-  Red-listed Hummingbirds 4 articles
-  *Eulidea yarrelli* *Chilean Woodstar* 2 articles  
*Myrtis yarrelli*

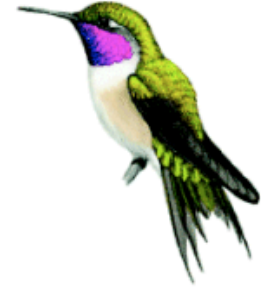

# Publications: User-defined species lists

1000s of RSS feeds

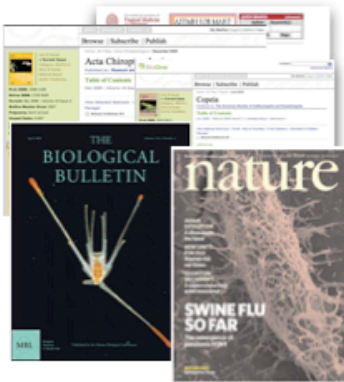

100,000s of articles

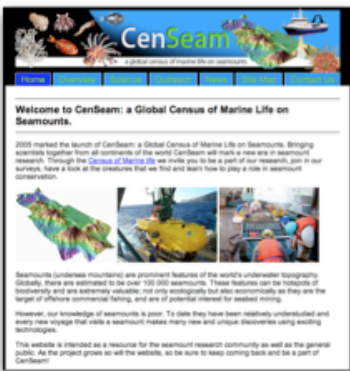

Species that live on Seamounts

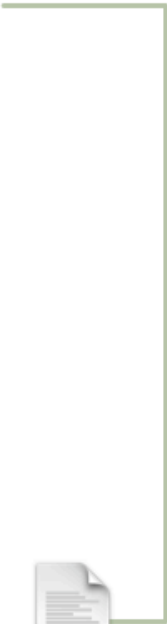

7,014 species

User-submitted species lists

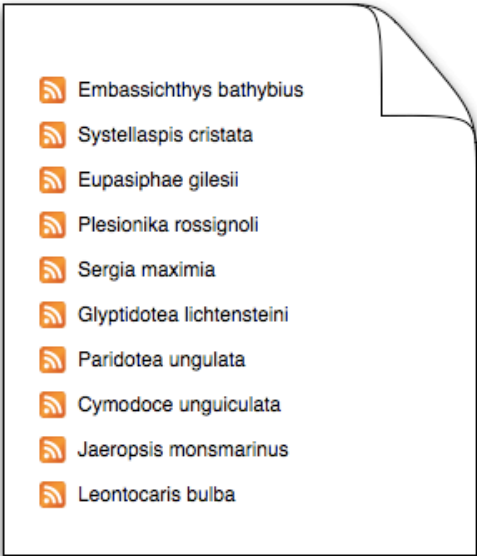

Page 1 of 700

# Consider RSS Integration for PESI

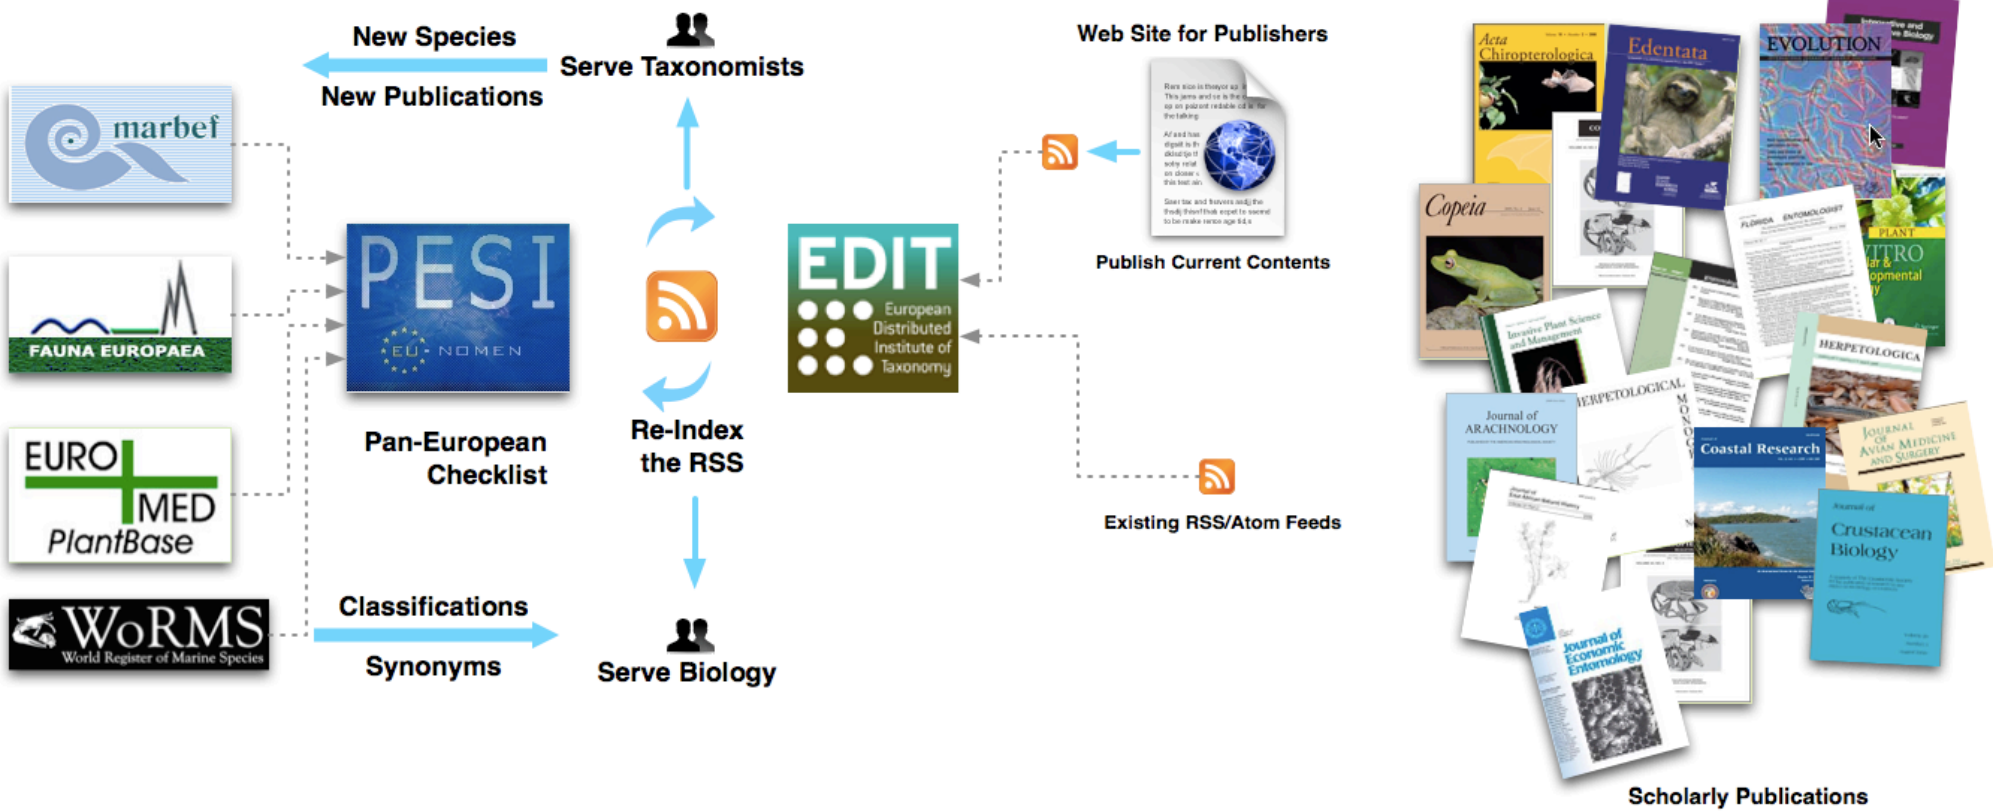

# 2009 Developments

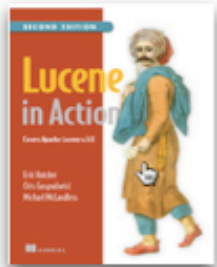

Distributed processing  
Indexing full journal runs  
Open Source technologies  
Massive pre-processing  
Community Standard APIs

## 1 Improve the Technology

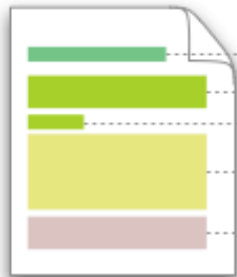

- ▶ Title
- ▶ Abstract
- ▶ Headers
- ▶ Body
- ▶ References

## 2 Increased granularity in Name Indexing

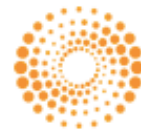

## JOURNAL CITATION REPORTS

### 3 Better management /filtering of journals

Taxonomic Names Processing Group

Quercus bycolor   
0 1 2 3 4 5 6 7 8 9 10

<http://code.google.com/p/taxon-name-processing/>

### 4 Improve community coordination

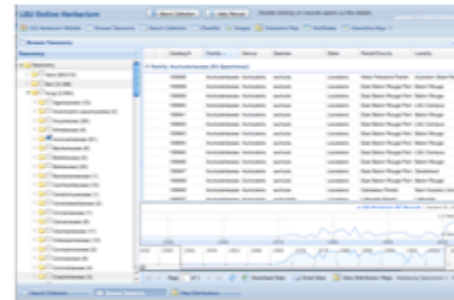

### 5 Better interfaces and services



---

# Thank you

[dremsen@gbif.org](mailto:dremsen@gbif.org)

Skype:dremsen

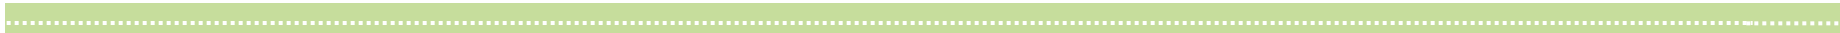

# From Publications to Taxonomic databases

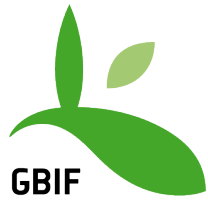



search    
 for

ABOUT BIOLINE
ALL JOURNALS
TESTIMONIALS
SUPPORT BIOLINE
News



**Ichthyological Bulletin**  
 J.L.B. SMITH INSTITUTE OF ICHTHYOLOGY  
 ISSN: 0073-4381  
 No. 64, 1995

[GET HTML FULLPAPER](#)  


**BIOLINE CODE: FB95003**  
 FULL PAPER LANGUAGE: ENGLISH  
 DOCUMENT TYPE: RESEARCH ARTICLE  
 DOCUMENT AVAILABLE FREE OF CHARGE

**Ichthyological Bulletin, No. 64, 1995**

**Fish community structure in three temporarily open/closed estuaries on the Natal coast**  
*T.D. Harrison and A.K. Whitfield*

**ABSTRACT**

The fishes of three small Natal estuaries, the Mhlanga, Damba and Zotsha were sampled over a period of two years. A total of 68 fish taxa representing 24 families, 39 genera and 55 species were captured during this study. Forty seven fish taxa were recorded in the Mhlanga estuary of w and juvenile mugilids **Mugil capensis Valenciennes, 1836**, **Mugil cephalus** and juvenile mugilids **Myxus capensis** fish taxa were recorded. **Mugil capensis** biomass captured in ichthyofauna numerical **holubi**, **Terapon** biomass in the Zotsha, **Mugil capensis**, **Mugil cephalus** and **Valamugil cunnesius**.

Classifying the species according to whether they were resident estuarine, freshwater, estuarine-dependent marine or marine species revealed that the first three groups were all well represented in the systems. **Oreochromis mossambicus** was the dominant freshwater species in all three estuaries. **Gilchristella aestuaria** and **Glossogobius callidus** were the principal estuarine species in the Mhlanga and the Damba respectively, with **Glossogobius aestuaria**, **Ambassis productus** and **Glossogobius callidus** being the dominant estuarine species captured in the Zotsha. The principal estuarine-dependent marine fishes captured in the Mhlanga were **Valamugil cunnesius**, **Valamugil** sp., juvenile mugilids, **Mugil capensis**, **Mugil cephalus** and **Liza**. In the Damba, **Mugil capensis** and **Mugil cephalus** were the dominant estuarine dependent marine species and in the

- on-the-fly
- up-to-date

# From Publications to other similar publications



**Bioline**  
International

search

for

ABOUT BIOLINE

ALL JOURNALS

TESTIMONIALS

SUPPORT BIOLINE

NEWS

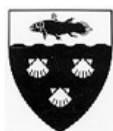

**Ichthyological Bulletin**

J.L.B. SMITH INSTITUTE OF ICHTHYOLOGY

ISSN: 0073-4381

No. 64, 1995

GET HTML  
FULLPAPER

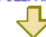

BIOLINE CODE: FB95003

FULL PAPER LANGUAGE: ENGLISH

DOCUMENT TYPE: RESEARCH ARTICLE

DOCUMENT AVAILABLE FREE OF CHARGE

**Ichthyological Bulletin, No. 64, 1995**

[en](#) **Fish community structure in three temporarily open/closed estuaries on the Natal coast**

*T.D. Harrison and A.K. Whitfield*

**ABSTRACT**

The fishes of three small Natal estuaries, the Mhlanga, Damba and Zotsha were sampled over a period of two years. A total of 68 fish taxa representing 24 families, 39 genera and 55 species were captured during this study. Forty seven fish taxa were recorded in the Mhlanga estuary of which *Gilchristella aestuaria*, *Oreochromis mossambicus*, *Valamugil cunnesius*, *Valamugil* sp. and juvenile mugilids numerically dominated. In terms of biomass, *Oreochromis mossambicus*, *Valamugil cunnesius*, *Liza alata*, *Myxus capensis* and *Mugil cephalus* dominated the ichthyofauna of the Mhlanga system. In the Damba estuary, 24 fish taxa were recorded, the most abundant being *Glossogobius callidus*, *M. capensis* and *O. mossambicus*. *M. capensis*, *M. cephalus*, *O. mossambicus* and *G. callidus* dominated the fish biomass captured in the Damba system. A total of 56 fish taxa were recorded in the Zotsha estuary during this study, with the ichthyofauna numerically dominated by juvenile mugilids, *G. aestuaria*, *O. mossambicus*, *Rhabdosargus holubi*, *Terapon jarbua*, *Ambassis productus* and *G. callidus*. The species which dominated the fish

(2009-02-27) **ScienceDirect Search: species**

*Artificial mouth opening fosters anoxic conditions that kill small estuarin...*

Classifying the species according to whether they were resident estuarine, freshwater, estuarine-dependent marine or marine species revealed that the first three groups were all well represented in the systems. *Oreochromis mossambicus* was the dominant freshwater species in all three estuaries. *Gilchristella aestuaria* and *Glossogobius callidus* were the principal estuarine species in the Mhlanga and the Damba respectively, with *Glossogobius aestuaria*, *A. productus* and *Glossogobius callidus* being the dominant estuarine species captured in the Zotsha. The principal estuarine-dependent marine fishes captured in the Mhlanga were *V. cunnesius*, *Valamugil* sp., juvenile mugilids, *M. capensis*, *M. cephalus* and *L. alata*. In the Damba, *M. capensis* and *M. cephalus* were the dominant estuarine-dependent marine species and in the Zotsha juvenile mugilids, *R. holubi*, *T. jarbua*, *M. capensis*, *Valamugil cunnesius*, *Valamugil robustus*, *M. cephalus*, *L. alata* and *Valamugil buchmanii* were the principal estuarine-dependent marine species.

- on-the-fly
- up-to-date
