# Supplementary material for: PESI - a taxonomic backbone for Europe
Source: PubMed Central journal article supplement (PMC4609752; doi:10.3897/bdj.3.e5848), 2015-09-28
Supplement: biodiversity_data_journal-3-e5848-s034.pdf [file biodiversity_data_journal-3-e5848-s034.pdf]

# PESI Focal Points Network

| Country / Region | Organisation                                                                     | Contact                                                                             | Role                                                                                  |
|------------------|----------------------------------------------------------------------------------|-------------------------------------------------------------------------------------|---------------------------------------------------------------------------------------|
| Albania          | University of Shkodra, Faculty of Natural Sciences (US)                          | Prof. Dhimiter Dhora                                                                |    |
| Armenia          | National Academy of Sciences of Armenia, Institute of Zoology (NASA)             | Prof. Hasmik Khachatryan                                                            |    |
| Austria          | Oberösterreichisches Landesmuseum (OOE.BZ)                                       | Dr. Michael Malicky                                                                 |    |
| Azerbaijan       | Institute of Zoology - Baku                                                      | Prof. Shaig Ibrahimov                                                               |    |
| Belarus          | United Institute of Informatics Problems National Academy of Sciences of Belarus | Prof. Alexander Tuzikov                                                             |    |
| Belgium          | Belgian Biodiversity Platform (BBPF)                                             | Dr. Hendrik Segers (past), Dr. Aaike de Wever (now)                                 |    |
| Belgium          | Flanders Marine Institute (VLIZ)                                                 | Dr. Ward Appeltans (past), Dr. Leen Vandepitte (now)                                |    |
| Bulgaria         | Institute of Oceanology (IO-Bas) – Varna                                         | Dr. Snejana Moncheva                                                                |    |
| Bulgaria         | National Museum of Natural History - Sofia (NMNHS)                               | Prof. Zlatozar Boev & Prof. Alexi Popov (past), prof. Nikolai Spassov (now)         |    |
| Croatia          | State Institute for Nature Protection (SINP)                                     | Dr. Igor Boršić                                                                     |    |
| Cyprus           | Department of Biological Sciences, University of Cyprus                          | Dr. Nicos Seraphides (past), Prof. Spyros Sfendourakis (now)                        |    |
| Czech            | Nature Conservation Agency CZ                                                    | Dr. Tomáš Soldán (past), Mgr. Karel Chobot (now)                                    |  |
| Denmark          | University of Copenhagen (UCPH)                                                  | Dr. Isabel Calabuig (past), vacant (now)                                            |  |
| Estonia          | University of Tartu – Tartu                                                      | Dr. Marti Martin (past), Prof. Urmas Kõljalg (now)                                  |  |
| Finland          | Zoological Museum of the Finnish Museum of Natural History                       | Juhani Lokki (past), vacant (now)                                                   |  |
| Finland          | Finnish Museum of Natural History, University of Helsinki                        | Prof. Pertti Uotila                                                                 |  |
| France           | Muséum National d'Histoire Naturelle (MNHN)                                      | Dr. Olivier Gargominy                                                               |  |
| France           | University of Sciences and Technology of Lille (USTL)                            | Prof. Jean-Claude Dauvin                                                            |  |
| Georgia          | Ilia Chavchavadze State University (ILIAUNI)                                     | Prof. David Tarkhnishvili & Dr. Giorgi Chaladze                                     |  |
| Germany          | Botanic Garden and Botanical Museum Berlin-Dahlem, Freie Universität Berlin      | Prof. Walter Berendsohn                                                             |  |
| Germany          | Senckenberg Museum – Frankfurt                                                   | Dr. Michael Tuerkay                                                                 |  |
| Greece           | National and Kapodistrian University of Athens (NKUA)                            | Dr. Anastasios Legakis                                                              |  |
| Greece           | Hellenic Centre for Marine Research (HCMR)                                       | Dr. Christos Arvanitidis                                                            |  |
| Hungary          | Hungarian Natural History Museum – Budapest                                      | Dr. László Peregovits                                                               |  |
| Iceland          | Icelandic Institute of Natural History                                           | Dr. Snorri Baldursson (past), Dr. Guðmundur Guðmundsson & Dr. Erling Ólafsson (now) |  |
| Ireland          | National University of Ireland (NUIG)                                            | Dr. Róisín Nash (past), Dr. Liam Lysaght & Dr. Eugenie Regan (now)                  |  |
| Ireland          | National University of Ireland (NUIG)                                            | Prof. Michael Guiry                                                                 |  |
| Israel           | Israel Oceanographic and Limnological Research (IOLR)                            | Prof. Bella Sarah Galil                                                             |  |
| Italy            | University Palermo, Department Botanical Sciences (DPCE)                         | Dr. Francesco M. Raimondo & Giannantonio Domina                                     |  |
| Italy            | Scientific Committee for the Italian Fauna (CSFI)                                | Dr. Fabio Stoch                                                                     |  |

|                      |                                                                                   |                                                                                               |                                                                                       |
|----------------------|-----------------------------------------------------------------------------------|-----------------------------------------------------------------------------------------------|---------------------------------------------------------------------------------------|
| Latvia               | University of Latvia (LU)                                                         | Dr. Voldemars Spungis & Dr. Arvids Barsevskis                                                 |    |
| Lithuania            | Nature Research Centre (EKOI)                                                     | Prof. Eduardas Budrys & Prof. Sergej Olenin                                                   |    |
| Luxembourg           | Musée national d'histoire naturelle – Luxembourg                                  | Dr. Marc Meyer & Dr. Edmée Engel (past), Dr. Armand Turpel & Dr. Tania Walisch (now)          |    |
| Macedonia (FYROM)    | Macedonian Museum of Natural History (MMNH)                                       | Prof. Vladimir Krpach                                                                         |    |
| Malta                | Malta Environment & Planning Authority – Floriana                                 | Prof. Patrick J. Schembri (past), Dr. Marie Therese Gambin (now)                              |    |
| Moldavia             | Institute of Zoology of the Academy of Sciences of Moldova                        | Dr. Laurentia Ungureanu                                                                       |    |
| Montenegrin          | Montenegrin Academy of Sciences and Arts (MASA)                                   | Prof. Gordan Karaman                                                                          |    |
| Netherlands          | Naturalis Biodiversity Center (NBC)                                               | Dr. Roy Kleukers                                                                              |    |
| Norway               | Norwegian Biodiversity Information Centre (Artsdatabanken)                        | Dr. Kaare Aagaard & Elisabeth Stur (past), Dr. Nils Valland & Dr. Toril Loennechen Moen (now) |    |
| Poland               | University of Warsaw, Faculty of Biology, Dept. of Ecology                        | Prof. Wieslaw Bogdanowicz (past), Dr. Piotr Tykarski (now)                                    |    |
| Poland               | Institute of Oceanology of Polish Academy of Sciences (IOPAN)                     | Prof. Jan Marcin Węśławski & Dr. Monika Kędra                                                 |    |
| Portugal - Azores    | Azorean Biodiversity Group and Universidade dos Açores                            | Prof. Paulo Borges & Dr. António Manuel de Frias Martins                                      |    |
| Portugal - Macarones | Estação de Biologia Marinha do Funchal – Madeira                                  | Prof. António Domingos Abreu                                                                  |    |
| Portugal - mainland  | Naturdata                                                                         | Dr. Pedro Cardoso (past), Dr. Ricardo Silva (now)                                             |  |
| Romania              | myNature Association (myNA)                                                       | Dr. Oana Moldovan (past), Dr. Adorian Ardelean (now)                                          |  |
| Russia               | Zoological Institute of Russian Academy of Sciences (ZIN RAS)                     | Dr. Sergei Medvedev & Dr. Alexander Ryss                                                      |  |
| Serbia               | Centre for the Balkan Biodiversity Conservation (CBBC)                            | Prof. Smiljka Šimić                                                                           |  |
| Slovakia             | Institute of Botany, Slovak Academy of Sciences (IBSAS)                           | Prof. Karol Marhold                                                                           |  |
| Slovakia             | Comenius University Bratislava (CUB)                                              | Dr. Eduard Stloukal                                                                           |  |
| Slovenia             | Slovenian National Institute of Biology (NIB)                                     | Dr. Davorin Tome                                                                              |  |
| Spain                | Consejo Superior de Investigaciones Científicas (CSIC)                            | Dr. Marian Ramos                                                                              |  |
| Spain                | University of Seville (USE)                                                       | Prof. Benito Valdés & Dr. Francisco Pina                                                      |  |
| Sweden               | Swedish Museum of Natural History (NRM)                                           | Dr. Sven Kullander (past), Dr. Anders Telenius (now)                                          |  |
| Switzerland          | Swiss Systematics Society (past), Centre Suisse de Cartographie de la Faune (now) | Dr. Jean Mariaux (past), Dr. Yves Gonseth & Dr. Pascal Tschudin (now)                         |  |
| Turkey               | University of Trakya (TU)                                                         | Prof. Nihat Aktac                                                                             |  |
| Ukraine              | A.O.Kovalevsky Institute of Biology of the Southern Seas (IBSS)                   | Prof. Volodymyr Vladymyrov & Dr. Oleksandra Sergeyeva                                         |  |
| Ukraine              | State Museum of Natural History, Nat. Ac. of Sciences of Ukraine (SMNH)           | Dr. Volodymyr Rizun                                                                           |  |
| United Kingdom       | Natural History Museum (NHM)                                                      | Dr. Charles Hussey (past), Dr. Chris Rapper (now)                                             |  |
| United Kingdom       | Marine Biological Association of the United Kingdom (MBA)                         | Dr. Dan Lear                                                                                  |  |

PESI project partners as well as associated partners are included in this list. For details about the Focal Points information services, please check the relevant Focal Points deliverables (D3.1 – FP Work-plan and D3.4 – FP Handbook).
