# Supplementary material for: PESI - a taxonomic backbone for Europe
Source: Biodivers Data J. 2015 Sep 28;(3):e5848. doi: 10.3897/BDJ.3.e5848 (PMC4609752; doi:10.3897/BDJ.3.e5848)
Supplement: Supplementary material 35 — PESI Webstatistics [file biodiversity_data_journal-3-e5848-s035.xlsx]

## Sheet: Blad1
Month	Unique monthly visitors	Number of monthly visits
2008-01-01	1	1
2008-02-01	8	11
mar-08	44	54
2008-04-01	49	60
may-08	61	88
2008-06-01	105	204
2008-07-01	166	325
2008-08-01	275	442
2008-09-01	417	687
oct-08	604	1047
2008-11-01	705	1322
2008-12-01	563	848
2009-01-01	453	697
2009-02-01	563	940
mar-09	644	1024
2009-04-01	633	969
may-09	588	926
2009-06-01	695	1070
2009-07-01	903	1484
2009-08-01	878	1280
2009-09-01	795	1273
oct-09	796	1452
2009-11-01	721	1206
2009-12-01	679	1064
2010-01-01	714	1050
2010-02-01	745	1029
mar-10	859	1262
2010-04-01	609	934
may-10	849	1422
2010-06-01	1144	1749
2010-07-01	1225	1667
2010-08-01	1199	1697
2010-09-01	931	1434
oct-10	714	1078
2010-11-01	766	1234
2010-12-01	718	1125
2011-01-01	783	1266
2011-02-01	856	1370
mar-11	1154	1911
2011-04-01	1171	1871
may-11	2521	3923
2011-06-01	6976	12628
2011-07-01	7650	14808
2011-08-01	8654	17682
2011-09-01	6040	14392
oct-11	6391	19633
2011-11-01	6730	22438
2011-12-01	6009	20893
2012-01-01	6189	21712
2012-02-01	7520	25411
mar-12	7617	25292
2012-04-01	6557	16049
may-12	7276	16358
2012-06-01	6186	14387
2012-07-01	5305	14092
2012-08-01	4776	9163
2012-09-01	4716	9122
oct-12	5199	10163
2012-11-01	5906	11742
2012-12-01	5976	11325
2013-01-01	6360	12455
2013-02-01	5293	8158
mar-13	5866	9081
2013-04-01	5488	8544
may-13	5324	8805
2013-06-01	5759	8770
2013-07-01	9584	13301
2013-08-01	5488	8924
2013-09-01	5298	8904
oct-13	9243	13747
2013-11-01	8637	14092
2013-12-01	4267	8059
2014-01-01	4254	7719
2014-02-01	3778	8201
mar-14	4231	14934
2014-04-01	4135	15346
may-14	4665	10929
2014-06-01	4853	9611
2014-07-01	4920	9961
2014-08-01	4451	9680
2014-09-01	4742	10369
oct-14	5273	11807
2014-11-01	5701	11259
2014-12-01	5466	10395
2015-01-01	5571	11205
2015-02-01	5475	10414
mar-15	6312	12064
2015-04-01	5789	10156
may-15	6778	11071
2015-06-01	6523	10564
2015-07-01	6161	10565
